# Supplementary material for: PepQuery2 democratizes public MS proteomics data for rapid peptide searching
Source: PubMed Central journal article supplement (PMC10113256; doi:10.1038/s41467-023-37462-4), 2023-04-18
Supplement: 41467_2023_37462_MOESM1_ESM.pdf [file 41467_2023_37462_MOESM1_ESM.pdf]

## Supplementary information

### **PepQuery2 democratizes public proteomics data for rapid peptide matching**

*Bo Wen<sup>1,2,3</sup>, Bing Zhang<sup>1,2#</sup>*

<sup>1</sup>Lester and Sue Smith Breast Center, Baylor College of Medicine, Houston, TX 77030, USA

<sup>2</sup>Department of Molecular and Human Genetics, Baylor College of Medicine, Houston, TX 77030, USA

<sup>3</sup>Present address: Department of Genome Sciences, University of Washington, Seattle, WA 98195, USA

# Correspondence should be addressed to B.Z. ([bing.zhang@bcm.edu](mailto:bing.zhang@bcm.edu)).

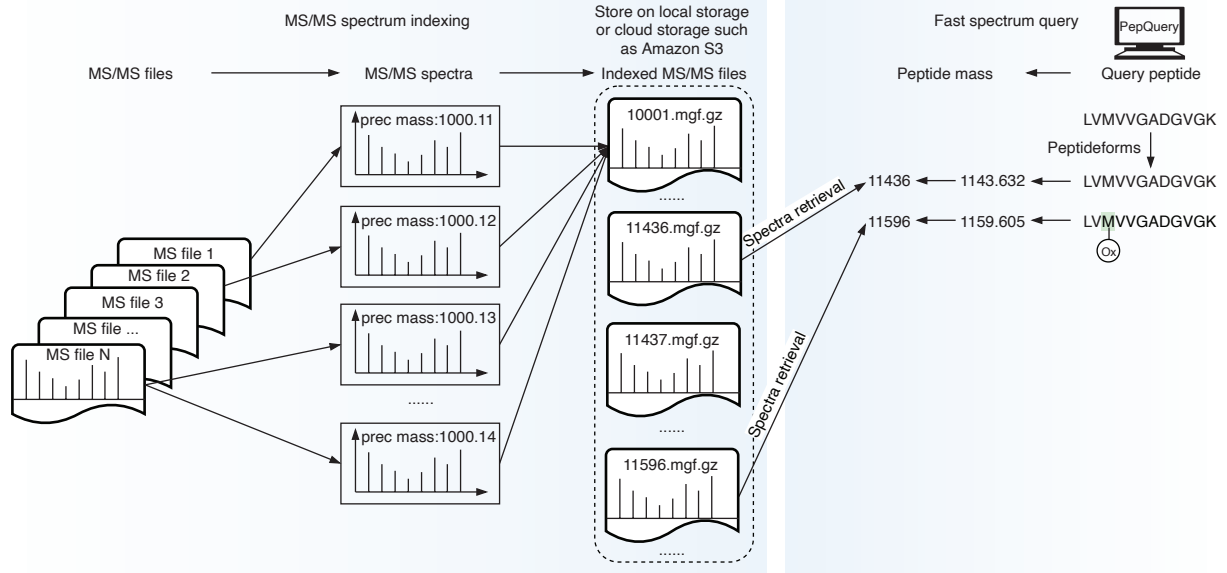

**Supplementary Figure 1: MS/MS data indexing and fast spectrum query.** The indexed MS/MS files for PepQueryDB are stored on cloud storage and can be accessed in any computer with internet connection.

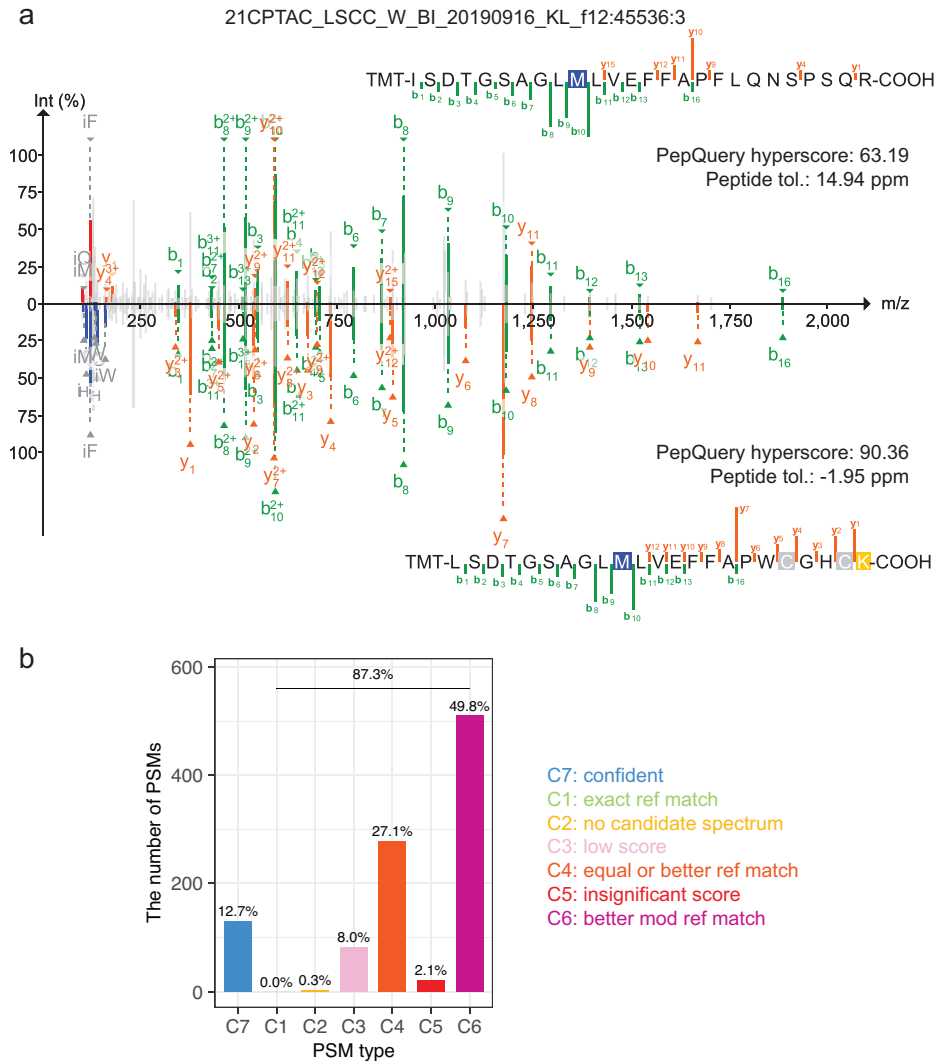

**Supplementary Figure 2: W2F peptide validation.** (a) The spectrum originally matched to a W2F peptide has better match to a reference peptide containing amino acid W in PepQuery2 validation. (b) PepQuery2 classified PSMs identified by a reanalysis supporting novel peptides resulted from W to F substitution into seven categories as described in Figure 1, and only C7 PSMs passed the validation.

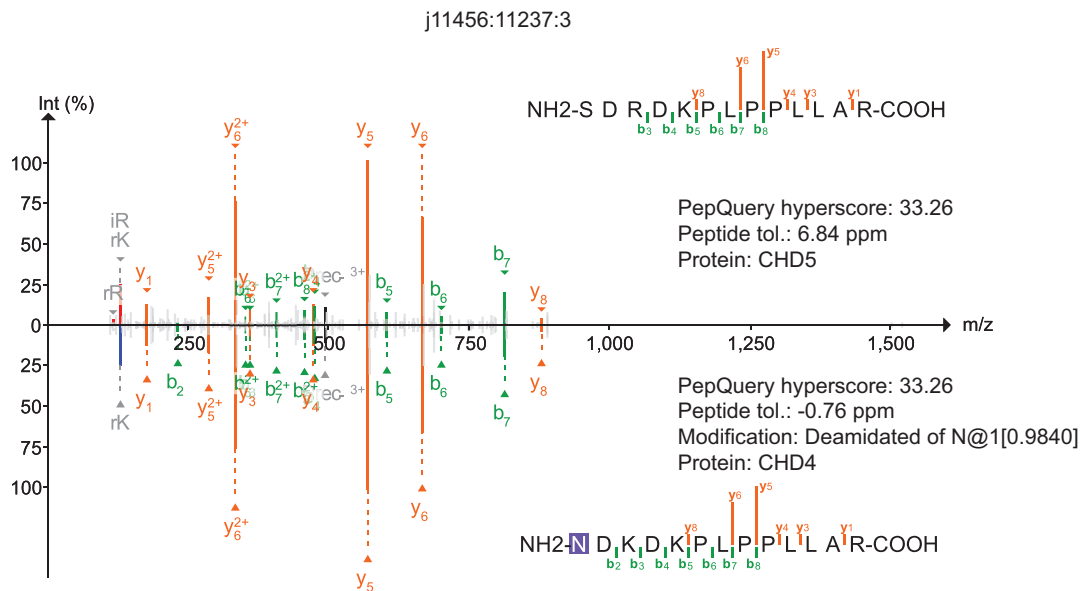

**Supplementary Figure 3:** Validation result for prey protein CHD5 previously reported in an AP-MS experiment using HDAC1 as the bait. An originally reported spectrum identifying CHD5 was found by PepQuery2 to have equally good match to a peptide from CHD4 with deamidation, but the peptide mass tolerance was much smaller for the CHD4 peptide.

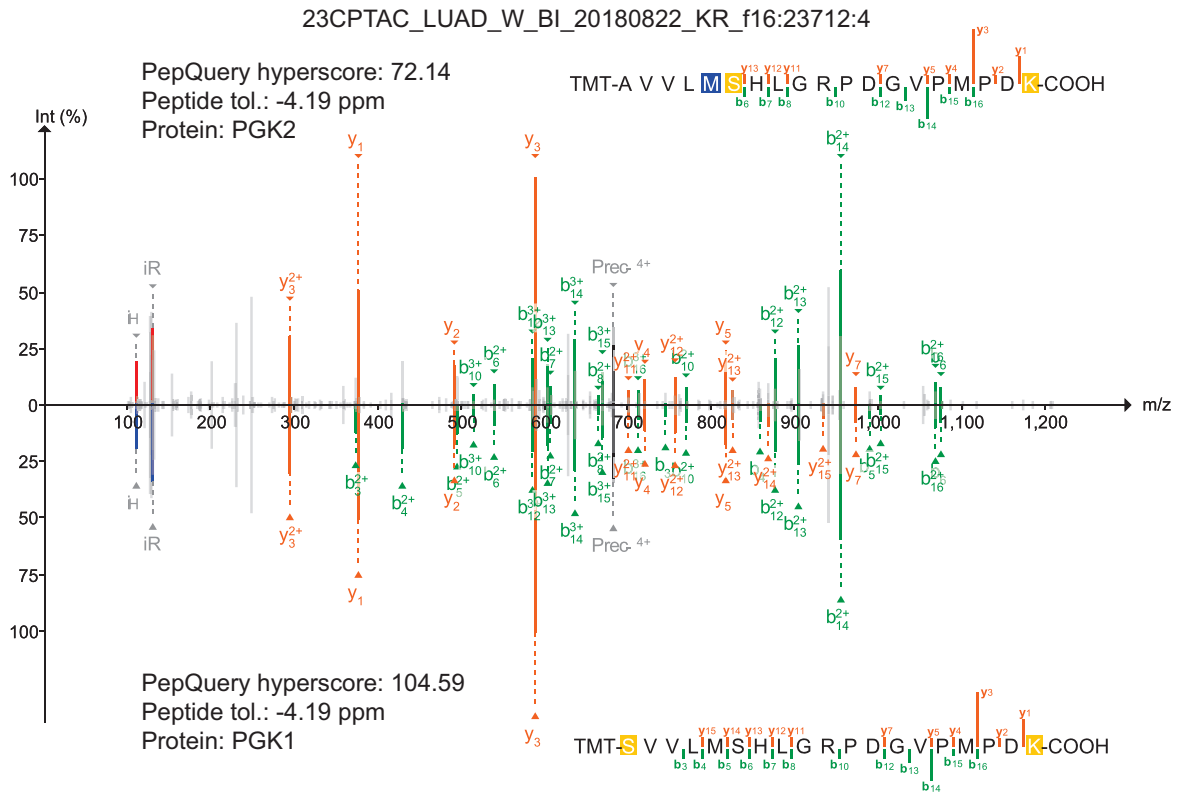

**Supplementary Figure 4:** An example PSM from the LUAD dataset for a PGK2 peptide. The spectrum was identified to have better match to a peptide from PGK1.

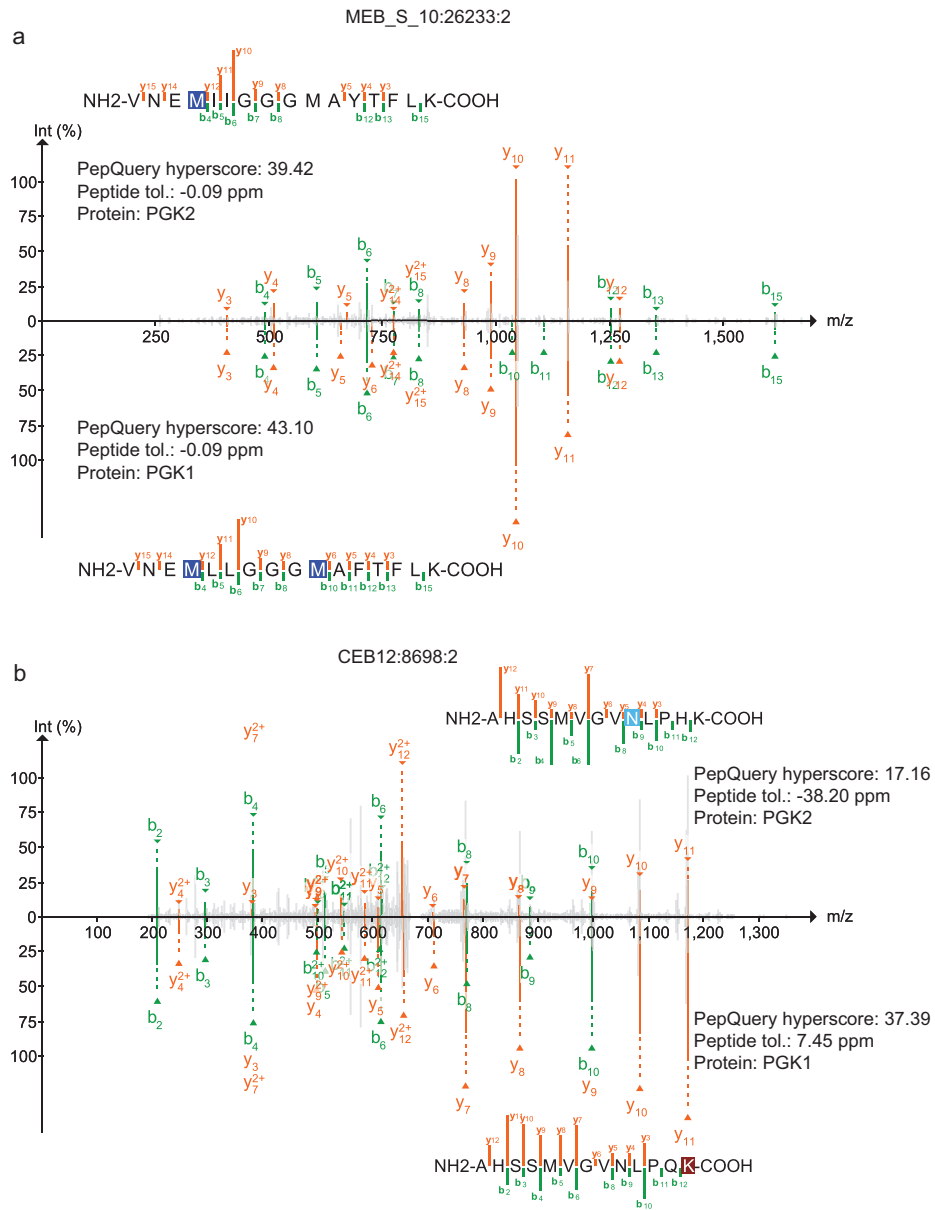

**Supplementary Figure 5:** Two representative PSMs from the colorectal cancer dataset MSV000088431 for PGK2 peptides. The spectra were found to have better matches to peptides from PGK1.

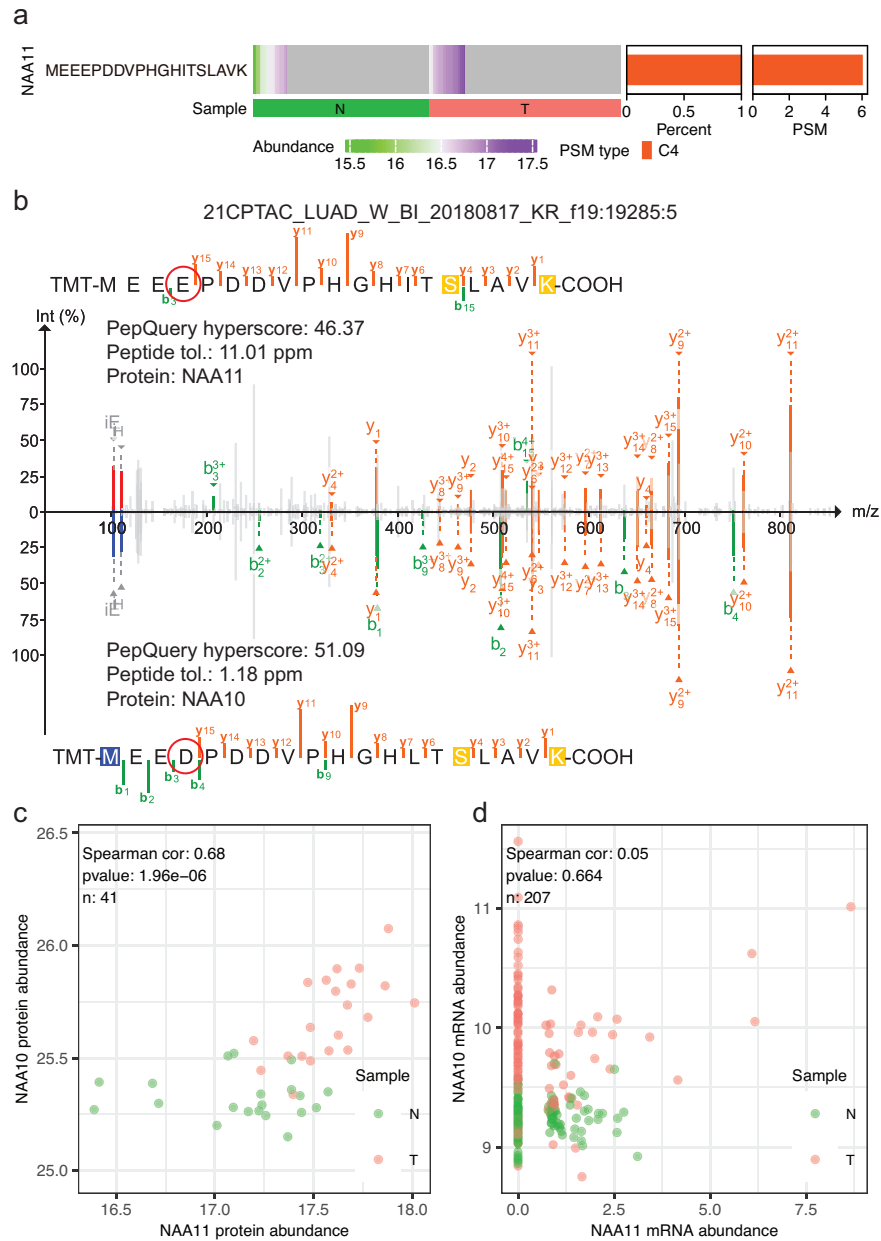

**Supplementary Figure 6: NAA11 peptide validation using PepQuery2.** (a) All PSMs previously reported to identifying NAA11 failed PepQuery2 validation (classified as C4). (b) A representative PSM from the LUAD dataset for the NAA11 peptide. The spectrum was identified to have a better match to a peptide from NAA10. (c) Protein abundance correlation between NAA11 and NAA10 in the LUAD dataset. (d) mRNA abundance correlation between NAA11 and NAA10 in the LUAD dataset. For c and d, only samples with non-missing and non-zero values in both samples were considered when calculating the spearman correlation.
