# Supplementary material for: PepQuery2 democratizes public MS proteomics data for rapid peptide searching
Source: PubMed Central journal article supplement (PMC10113256; doi:10.1038/s41467-023-37462-4), 2023-04-18
Supplement: 41467_2023_37462_MOESM3_ESM.pdf [file 41467_2023_37462_MOESM3_ESM.pdf]

## Description of Additional Supplementary Files

**Title:** Supplementary Data 1.

**Description:** A list of MS/MS datasets included in the PepQueryDB.

**Title:** Supplementary Data 2.

**Description:** Identified PSMs for the KRAS G12D mutant peptide.

**Title:** Supplementary Data 3.

**Description:** Results for validating novel peptides with W to F substitution.

**Title:** Supplementary Data 4.

**Description:** The list of nuORF-derived peptides identified in healthy tissues and associated information.

**Title:** Supplementary Data 5.

**Description:** The list of identified missing proteins and associated information.
